# Supplementary material for: A randomized single-blinded, parallel-arm group feasibility trial evaluating role of pectoral nerve block on serum vascular endothelial growth factor levels in patients undergoing unilateral modified radical mastectomy
Source: PubMed Central journal article supplement — Med Gas Res. 2020 Nov 19;10(4):179–84. doi: 10.4103/2045-9912.299465 (PMC8092146; doi:10.4103/2045-9912.299465), 2020-11-19
Supplement: MGR-10-179_Suppl1.pdf [file MGR-10-179_Suppl1.pdf]

# **PARTICIPANT INFORMED CONSENT FORM (PICF)**

Participant identification number for this trial: \_\_\_\_\_

Title of project “Effects of Perioperative Anaesthetic Strategies on Biomarkers of Breast Cancer Recurrence: A Randomized, Blinded, Controlled Clinical Trial”

Name of Principal Investigator: Dr. Nishith Govil, Tel. No(s). 8126101759

The information regarding the study has been explained in detail to me, in a language that I comprehend, and I have fully understood the contents.

I understand that the information collected about me from my participation in this research and sections of any of my medical notes may be looked at by responsible individuals from AIIMS.

I agree to take part in the above study.

\_\_\_\_\_

Date:

(Signatures / Left Thumb Impression)

Place:

Name of the Participant : \_\_\_\_\_

Son / Daughter of : \_\_\_\_\_

Complete postal address : \_\_\_\_\_

This is to certify that the above consent has been obtained in my presence.

\_\_\_\_\_

Name & Signatures

Date:

Place:

## रोगी स्वीकृति / अनापत्ति पत्र

**शोध का शीर्षक:** स्तन कैंसर की स्थिति के बायोमार्कर पर पेरिऑपरेटिव एनेस्थेटिक रणनीतियों का प्रभाव: एक यादृच्छिक, अंधा, नियंत्रित नैदानिक परीक्षण

**प्रधान अन्वेषक का नाम:** डॉ। निशीथ गोविल, 8126101759

अध्ययन के बारे में जानकारी के बारे में मुझे विस्तार से समझाया गया है, एक ऐसी भाषा में जिसे मैं समझता हूँ, और मैंने पूरी तरह से सामग्री को समझ लिया है।

मैं समझता हूँ कि इस शोध में मेरी भागीदारी से मेरे बारे में एकत्र की गई जानकारी और मेरे किसी भी मेडिकल नोट के अनुभागों को एम्स के जिम्मेदार व्यक्तियों द्वारा देखा जा सकता है।

मैं उपरोक्त अध्ययन में भाग लेने के लिए सहमत हूँ।

-----  
तारीख:

.....  
रोगी के हस्ताक्षर/ बायं हाथ के अंगूठे का निशान

रोगी के पिता/पती का नाम

रोगी का पता

यह स्वीकृति पत्र निम्नलिखित की उपस्थिति में भरवाया गया है (हस्ताक्षर, नाम, पता):

नाम और हस्ताक्षर: .....

दिनांक:

## **PARTICIPANT INFORMATION SHEET**

*Dear Patient/guardian of .....*

We are conducting a study at the All India Institute of Medical Sciences to **“Effects of Perioperative Anaesthetic Strategies on Biomarkers of Breast Cancer Recurrence: A Randomized, Blinded, Controlled Clinical Trial”**

Patient/guardian is invited to take part in the study. You are requested to go through the following paragraphs:

1. Purpose of the Study: The aim of the study is to study the Effects of Perioperative Stratagem on Biobehavioural Profile of Breast Cancer: A Prospective Clinical Trial
2. Methodology: If you agree to participate in this study, you will either receive conventional anesthesia protocol or a novel anesthesia protocol.
3. Any risk to the subject associated with the study: no risk regarding this study
4. Confidentiality: All the records will be confidential and the patient’s identity would be known to the chief investigator and would not be released to anybody else.
5. Provision of free treatment for research related injury: No research related injury is expected. If any complication does occur, you will be provided free treatment by the hospital.
6. Compensation of subjects for disability or death resulting from such injury: No disability or death is expected from the study.
7. Freedom of individual to participate and to withdraw from research at any time without penalty or loss of benefits to which the subject would otherwise entitled: Participation in the study is voluntary. Refusal to participate will not influence care of the participants in this hospital in any way.
8. Costs and Source of investigations and drugs: You will not be charged anything for anything else related to this study project.
9. Available information sources: In case of any doubt regarding the study or any emergency, you are welcome to contact the undersigned personally or over telephone.

## आंशिक सूचना शीट

प्रिय रोगी / संरक्षक हम अखिल भारतीय आयुर्विज्ञान संस्थान में "स्तन कैंसर की पुनरावृत्ति के बायोमार्कर पर पेरिऑपरेटिव एनेस्थेटिक स्ट्रेटेजीज के प्रभाव: एक रैंडमाइज्ड, ब्लाइंड, नियंत्रित नैदानिक परीक्षण" पर एक अध्ययन कर रहे हैं।

अध्ययन में भाग लेने के लिए रोगी / अभिभावक को आमंत्रित किया जाता है। आपसे निम्नलिखित पैराग्राफ के माध्यम से जाने का अनुरोध किया जाता है:

1. अध्ययन का उद्देश्य: अध्ययन का उद्देश्य स्तन कैंसर के Biobehavioural प्रोफाइल पर पेरिऑपरेटिव स्ट्रेटेजम के प्रभावों का अध्ययन करना है: एक संभावित नैदानिक परीक्षण
2. कार्यप्रणाली: यदि आप इस अध्ययन में भाग लेने के लिए सहमत हैं, तो आपको या तो पारंपरिक संज्ञाहरण प्रोटोकॉल या एक उपन्यास संज्ञाहरण प्रोटोकॉल प्राप्त होगा।
3. अध्ययन से जुड़े विषय पर कोई जोखिम: इस अध्ययन के संबंध में कोई जोखिम नहीं
4. गोपनीयता: सभी रिकॉर्ड गोपनीय होंगे और रोगी की पहचान मुख्य अन्वेषक को पता होगी और किसी अन्य को जारी नहीं की जाएगी।
5. अनुसंधान से संबंधित चोट के लिए मुफ्त उपचार का प्रावधान: अनुसंधान से संबंधित किसी भी चोट की उम्मीद नहीं है। यदि कोई जटिलता होती है, तो आपको अस्पताल द्वारा मुफ्त उपचार प्रदान किया जाएगा।
6. ऐसी चोट के परिणामस्वरूप विकलांगता या मृत्यु के लिए विषयों का मुआवजा: अध्ययन से कोई विकलांगता या मृत्यु की उम्मीद नहीं की जाती है।
7. किसी को किसी भी समय दंड या लाभ के नुकसान के बिना किसी भी समय अनुसंधान से पीछे हटने की स्वतंत्रता, जिसका विषय अन्यथा हकदार होगा: अध्ययन में भागीदारी स्वैच्छिक है। भाग लेने से इनकार करना किसी भी तरह से इस अस्पताल में प्रतिभागियों की देखभाल को प्रभावित नहीं करेगा।
8. लागत और जांच और दवाओं का स्रोत: इस अध्ययन परियोजना से संबंधित किसी भी चीज़ के लिए आपसे कुछ भी शुल्क नहीं लिया जाएगा।
9. उपलब्ध सूचना स्रोत: अध्ययन या किसी भी आपात स्थिति के बारे में किसी भी संदेह के मामले में, आपका व्यक्तिगत रूप से या टेलीफोन पर अधोहस्ताक्षरी से संपर्क करने का स्वागत है।
