# Supplementary material for: A randomized single-blinded, parallel-arm group feasibility trial evaluating role of pectoral nerve block on serum vascular endothelial growth factor levels in patients undergoing unilateral modified radical mastectomy
Source: PubMed Central journal article supplement — Med Gas Res. 2020 Nov 19;10(4):179–84. doi: 10.4103/2045-9912.299465 (PMC8092146; doi:10.4103/2045-9912.299465), 2020-11-19

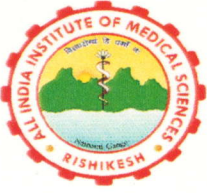

All India Institute of Medical Sciences, Rishikesh (Uttarakhand)  
अखिल भारतीय आयुर्विज्ञान संस्थान, ऋषिकेश (उत्तराखण्ड)  
Institutional Ethics Committee

संस्थागत नीति समिति

(Reg. No.: ECR/736/Inst/UK/2015/RR-18)

Letter No- AIIMS/IEC/19/...1002.

Date: 09/08/2019

To,

Dr. Nishith Govil  
Associate Professor  
Department of Anaesthesiology  
AIIMS, Rishikesh

Sub: Research Proposal titled **“Effect of Perioperative Stratagem on Biobehavioural Profile of Breast Cancer: A Prospective Clinical Trial”** submitted to Institutional Ethics Committee (IEC), AIIMS, Rishikesh.

Dear Dr. Nishith Govil,

This is in reference to (No. 247/IEC/PhD./2019) your research proposal titled **“Effect of Perioperative Stratagem on Biobehavioural Profile of Breast Cancer: A Prospective Clinical Trial”**. Institutional Ethics Committee, All India Institute of Medical Sciences, Rishikesh has approved this research proposal in its present form.

**This approval is valid until duration of project mentioned from date of approval. In case of extension in research period, a written request for extension is to be sent to Institutional Ethics Committee forwarded through Research Cell.**

You are advised to be familiar with ICMR guidelines on Biomedical Research in Human beings and also to adhere to principles of Good Clinical Practice. You are required to submit completion report of your research within 6 months of scheduled completion date of IEC, AIIMS, Rishikesh.

Yours Sincerely,

Prof. Shalinee Rao  
Member Secretary  
Institutional Ethics Committee  
AIIMS, Rishikesh

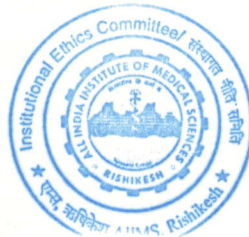

Supplement: MGR-10-179_Suppl2.pdf [file MGR-10-179_Suppl2.pdf]
